# Supplementary material for: Antitumor Effect of Novel Berberine Analogues in a Canine Mammary Tumor Cell Line and in Zebrafish Reporters via Wnt/β-Catenin and Hippo Pathways
Source: Preprints.org preprint supplement (doi:10.20944/preprints202311.1423.v1), 2023-11-22
Supplement: Supplementary file 1 [file supplementary]

| **Drug** | **IC50 ± SD (μM)** |
| --- | --- |
| Berberine (BBR) | >40 |
| NAX012 | 8.9 ± 2.7 |
| NAX014 | 11.0 ± 1.2 |
| NAX035 | 10.0 ± 1.8 |
| NAX053 | 6.2 ± 1.6 |
| NAX057 | 5.9 ± 3.3 |
| NAX060 | 6.8 ± 0.9 |
| Berberrubine (BRR) | >40 |
| NAX085 | >40 |
| NAX118 | >40 |

**Table S1.** Half maximal inhibitory concentration (IC50) and standard deviation (SD) of different compounds after 24 hours of treatment of CF33 cells.

| **Drug** | **LC50 ± SD (μM)** |
| --- | --- |
| Berberine (BBR) | 200 ± 1.40 |
| NAX012 | 100 ± 0.73 |
| NAX014 | 100 ± 0.35 |
| NAX035 | 20 ± 0.42 |
| NAX053 | 10 ± 0.35 |
| NAX057 | 10 ± 0.41 |
| NAX060 | 20 ± 0.64 |
| Berberrubine (BRR) | 200 ± 1.24 |
| NAX085 | 200 ± 1.33 |
| NAX118 | 200 ± 1.17 |

**Table S2.** Different drugs toxicity effects (LC50) and standard deviation (SD) on zebrafish larvae treated for 24 hours.
